# Supplementary material for: Artificial neural network approach for prediction of AuNPs biosynthesis by Streptomyces flavolimosus, characterization, antitumor potency in-vitro and in-vivo against Ehrlich ascites carcinoma
Source: PubMed Central journal article supplement (PMC10403537; doi:10.1038/s41598-023-39177-4), 2023-08-04
Supplement: 41598_2023_39177_MOESM1_ESM.pdf [file 41598_2023_39177_MOESM1_ESM.pdf]

**Artificial neural network approach for prediction of AuNPs biosynthesis by  
*Streptomyces flavolimosus*, characterization, antitumor potency *in-vitro* and *in-vivo*  
against EAC tumor mass**

**<sup>1</sup>Noura El-Ahmady El-Naggar, <sup>1</sup>Nashwa H. Rabei, Mohamed F. Elmansy<sup>2</sup>, Omar T. Elmessiry<sup>2</sup>, Mostafa K. El-Sherbeny<sup>2</sup>, Mohanad E. El-Saidy<sup>2</sup>, Mohamed T. Sarhan<sup>2</sup>,  
Manar G. Helal<sup>3</sup>**

<sup>1</sup>Department of Bioprocess Development, Genetic Engineering and Biotechnology Research Institute, City of Scientific Research and Technological Applications (SRTA-City), Alexandria 21934, Egypt.

<sup>2</sup>Biotechnology and Its Application Program, Department of Botany, Faculty of Science, Mansoura University, Mansoura 35516, Egypt.

<sup>3</sup>Department of Pharmacology and Toxicology, Faculty of Pharmacy, Mansoura University, Mansoura 35516, Egypt.

**Corresponding Author's information**

**Dr. Noura El-Ahmady Ali El-Naggar**

**Address:**

Bioprocess Development Department,

Genetic Engineering and Biotechnology Research Institute,

City of Scientific Research and Technological Applications,

New Borg El- Arab City, 21934, Alexandria, Egypt

**Tel:** (002)01003738444

**Fax:** (002)03 4593423

**E-mail:** [nouralahmady@yahoo.com](mailto:nouralahmady@yahoo.com)

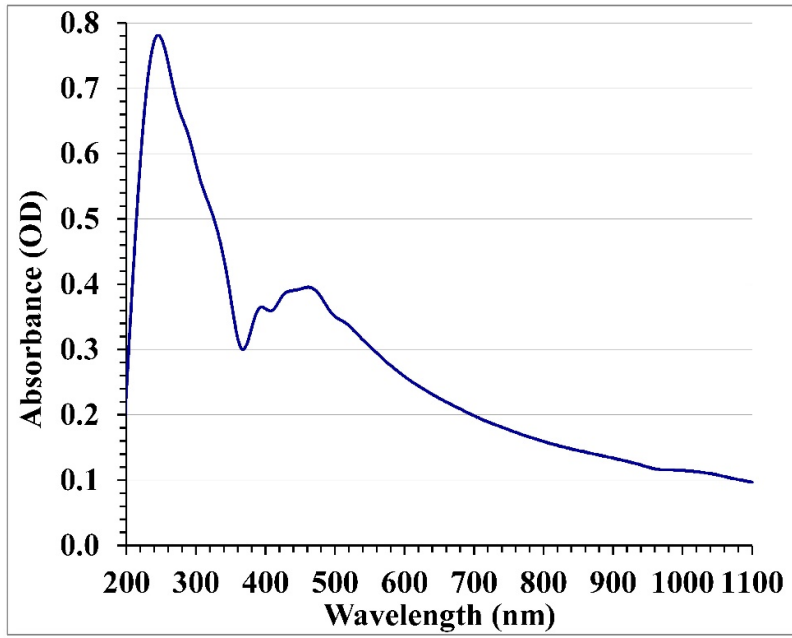

**Supplementary Figure S 1.** The absorbance spectrum of the cell-free supernatant.

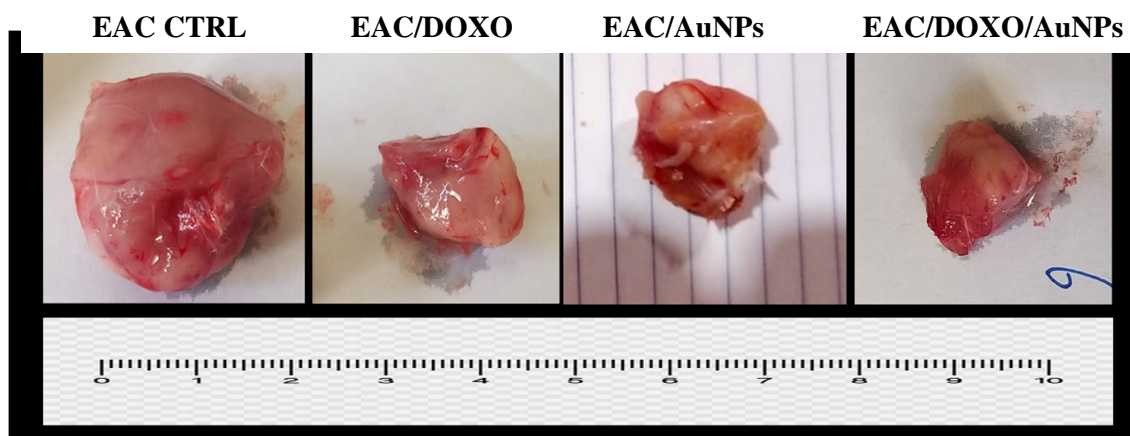

**Supplementary Figure S 2.** raw tumor images, all tumor images (**Figure 10 C**) were taken at the same magnification power, zooming and distance from camera.
